# Supplementary material for: Electrochemical synthesis of the allotrope allo-Ge and investigations on its use as an anode material
Source: Royal Society of Chemistry journal article supplement (doi:10.1039/c7ta03164e), 2017-01-01
Supplement: c7ta03164e1.pdf [file c7ta03164e1.pdf]

# Electrochemical Synthesis of the Allotrope *allo*-Ge and Investigations on the Use as an Anode Material

L. M. Scherf,<sup>a†</sup> J. Hattendorff,<sup>b†</sup> I. Buchberger,<sup>b</sup> S. Geier,<sup>a</sup> H. A. Gasteiger,<sup>b</sup> T. F. Fässler<sup>a</sup>

<sup>a</sup> Lehrstuhl für Anorganische Chemie mit Schwerpunkt Neue Materialien, Department of Chemistry, Technische Universität München, Lichtenbergstr. 4, 85749 Garching b. München, Germany.

<sup>b</sup> Lehrstuhl für Technische Elektrochemie, Department of Chemistry, Technische Universität München, Lichtenbergstr. 4, 85749 Garching b. München, Germany.

† These authors contributed equally to this work.

## Contents

|                                                                                       |   |
|---------------------------------------------------------------------------------------|---|
| PXRD pattern of LiGe .....                                                            | 2 |
| PXRD pattern of Li <sub>7</sub> Ge <sub>12</sub> .....                                | 2 |
| PXRD patterns of extracted Li <sub>7</sub> Ge <sub>12</sub> electrode materials ..... | 3 |
| Potential plot of Li <sub>7</sub> Ge <sub>12</sub> half-cells .....                   | 3 |
| PXRD pattern of <i>m-allo</i> -Ge .....                                               | 4 |
| PXRD pattern of $\alpha$ -Ge .....                                                    | 4 |
| SEM images of electrochemically synthesized <i>allo</i> -Ge .....                     | 5 |
| Particle Size Analysis .....                                                          | 5 |
| Coin Cell dQ/dV Curves .....                                                          | 6 |
| Ex-situ PXRD patterns of coin cell anode materials after cycling .....                | 7 |
| Selected in-situ PXRD patterns .....                                                  | 7 |
| dQ/dV Plot for • -Ge pouch cells .....                                                | 8 |
| References .....                                                                      | 9 |

### PXRD pattern of LiGe

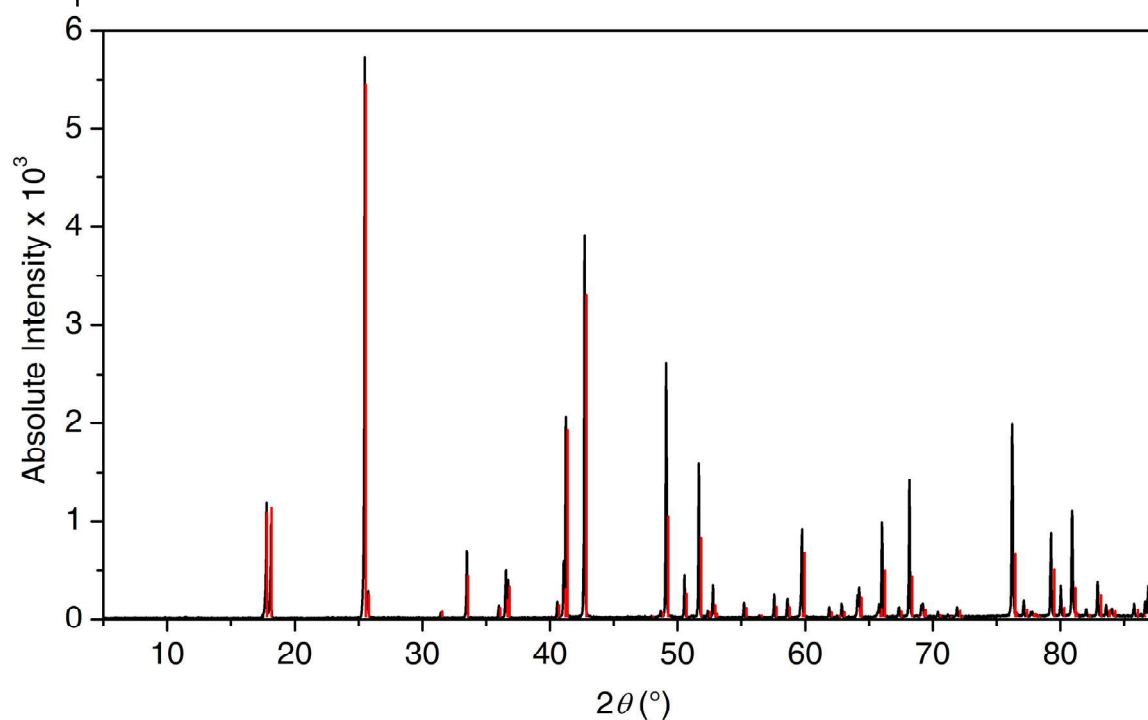

**Fig. S1:** Experimental (black) and calculated (red) PXRD patterns of LiGe. PSD steps 1.5 °, time/step 15 s.

### PXRD pattern of Li<sub>7</sub>Ge<sub>12</sub>

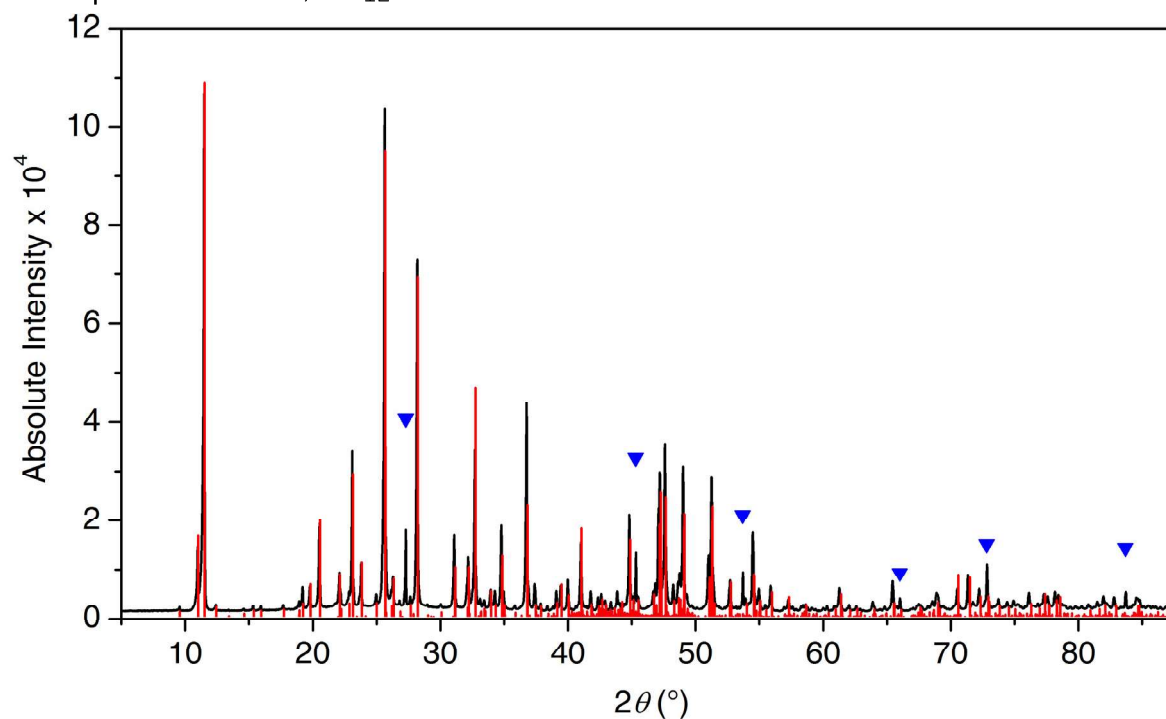

**Fig. S2:** Experimental (black) and calculated (red) PXRD patterns of Li<sub>7</sub>Ge<sub>12</sub>. Blue triangles denote traces of α-Ge. PSD steps 0.07 °, time/step 45 s.

## PXRD patterns of extracted $\text{Li}_7\text{Ge}_{12}$ electrode materials

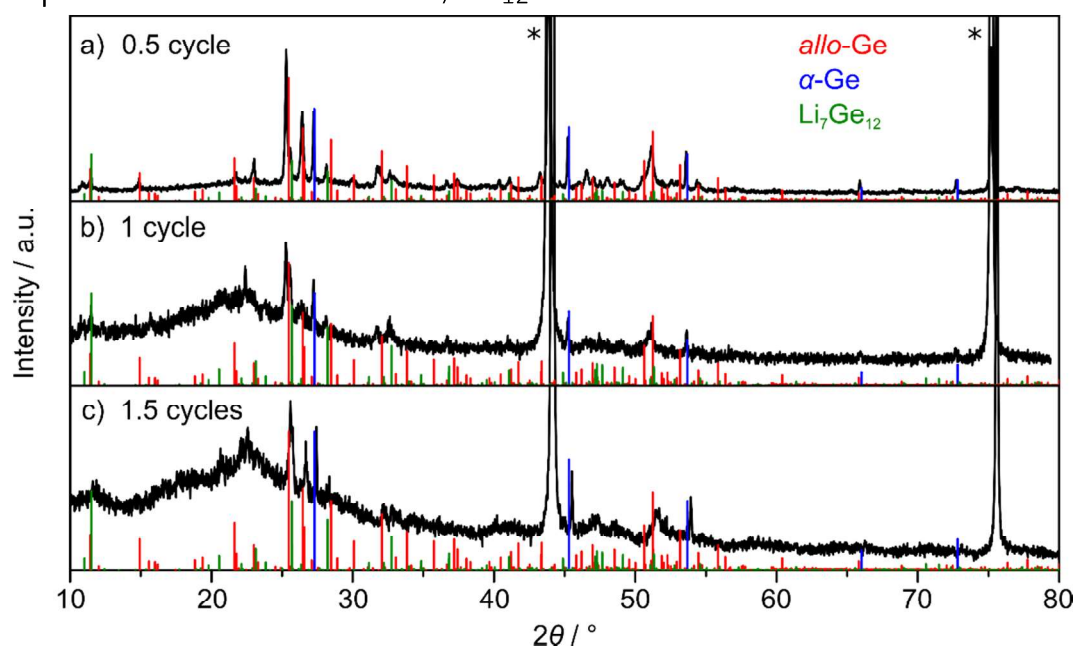

**Fig. S3.** Powder diffraction patterns of electrode material extracted from coin cells; a) after one delithiation step *allo*-Ge has clearly been formed, b) after one full delithiation/lithiation cycle less *allo*-Ge is present and a broad signal appears around  $22^\circ$ , c) after 1.5 cycles the ratio of crystalline phases does not change anymore but the broad signal grows; theoretical powder patterns of *allo*-Ge,<sup>1</sup>  $\alpha$ -Ge,<sup>2</sup> and  $\text{Li}_7\text{Ge}_{12}$ <sup>3</sup> are given in red, blue, and green, respectively; diamond powder was added to all electrode materials post-cycling for easier handling of the material, corresponding reflexes are marked by an asterisk. The 1 and 1.5 cycle samples are mainly amorphous and are scaled differently than the 0.5 cycle samples to elucidate the remaining crystalline phases.

## Potential plot of $\text{Li}_7\text{Ge}_{12}$ half-cells

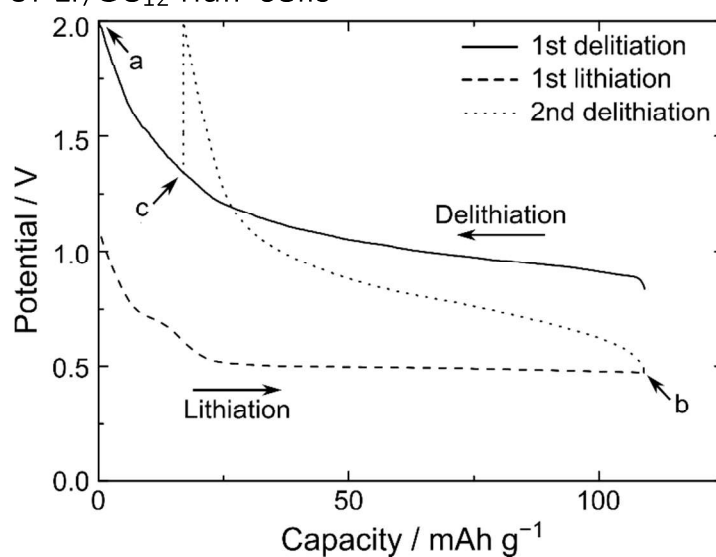

**Fig. S4.** Potential curves of the first 1.5 cycles of  $\text{Li}_7\text{Ge}_{12}$  half-cells beginning with the first delithiation cycle to 2 V. The powder diffraction state of powder diffraction patterns a–c in Fig. S3 are marked with the respective letters.

PXRD pattern of *m-allo*-Ge

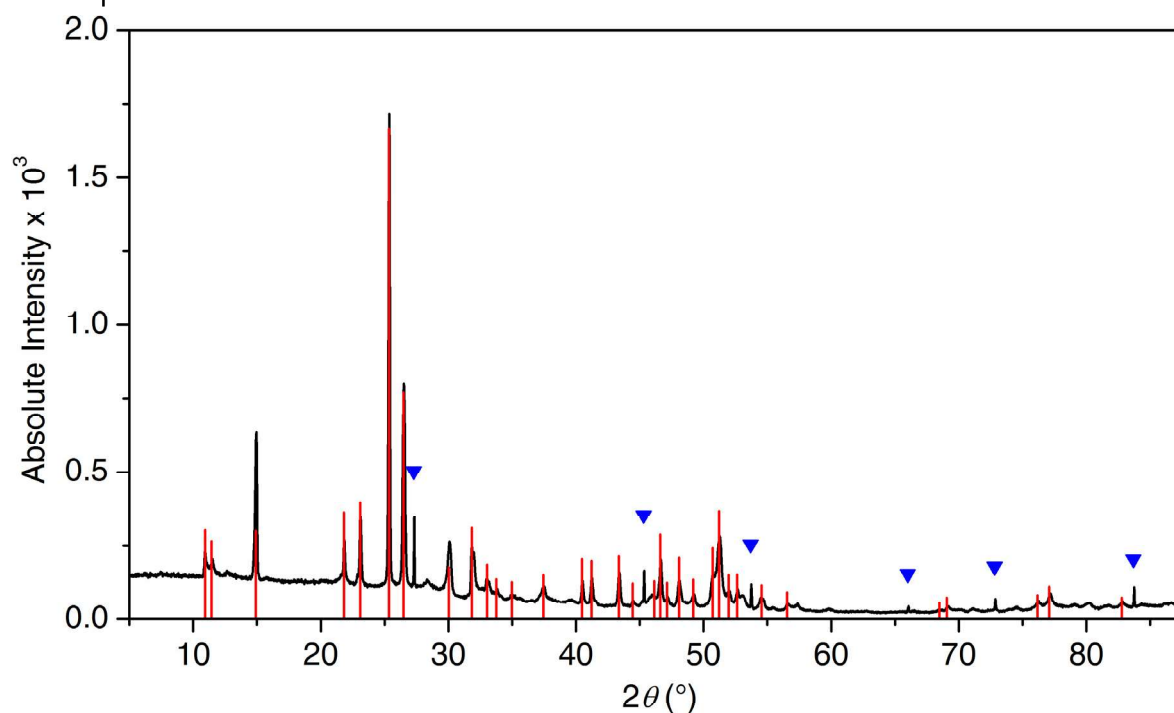

**Fig. S5:** Experimental (black) and calculated (red) PXRD patterns of *m-allo*-Ge. Blue triangles denote traces of  $\alpha$ -Ge. PSD steps  $0.07^\circ$ , time/step 30 s.

PXRD pattern of  $\alpha$ -Ge

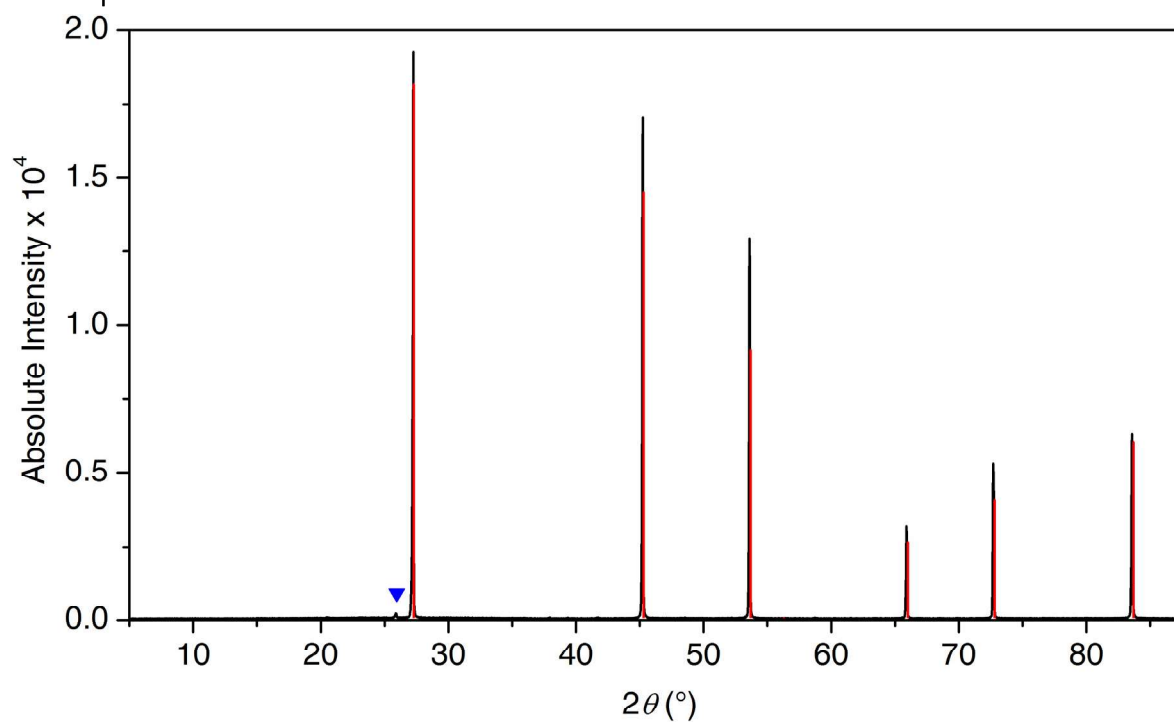

**Fig. S6:** Experimental (black) and calculated (red) PXRD patterns of  $\alpha$ -Ge. The blue triangle marks traces of  $\text{GeO}_2$ . PSD steps  $1.5^\circ$ , time/step 15 s.

SEM images of electrochemically synthesized *allo*-Ge

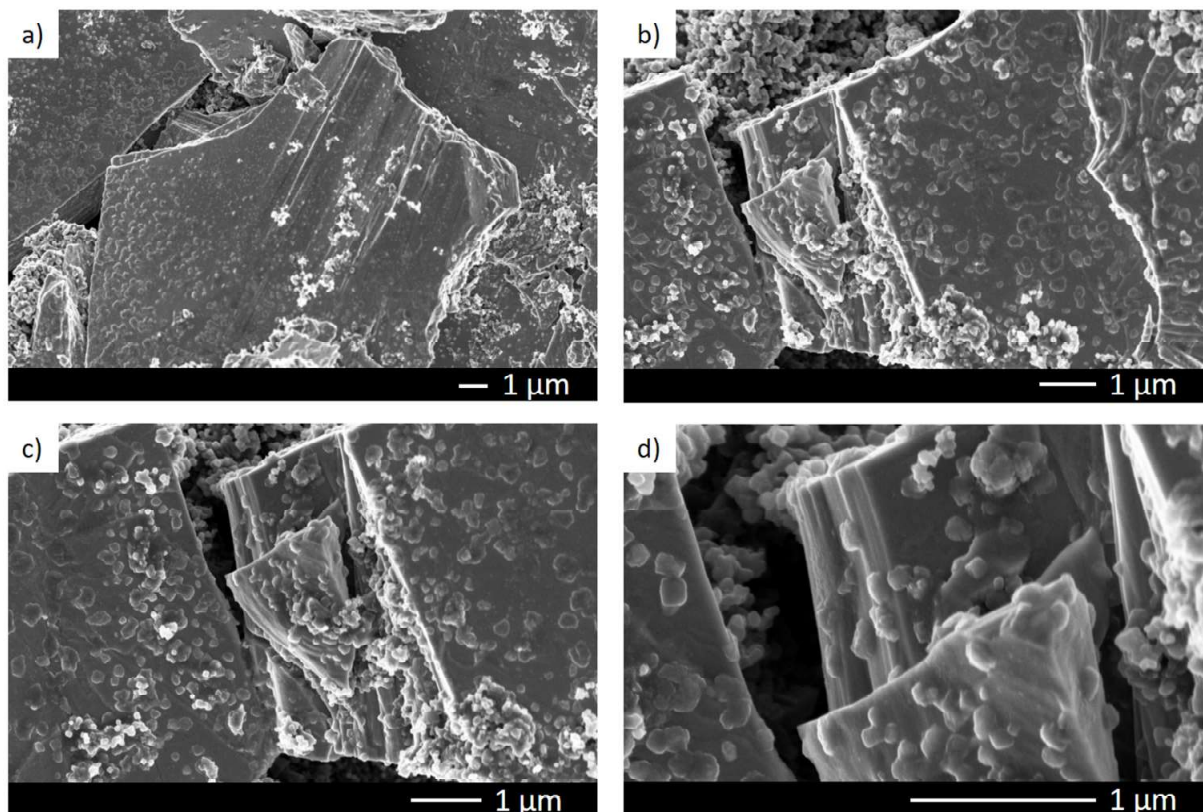

**Fig. S7.** SEM images of electrochemically synthesized *allo*-Ge.

## Particle Size Analysis

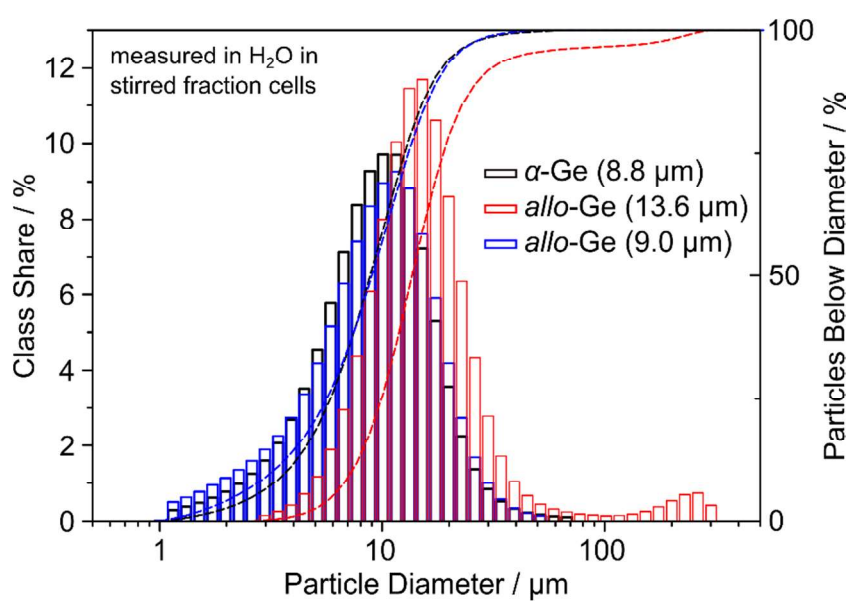

**Fig. S8.** Particle size analysis of Ge anode materials in H<sub>2</sub>O in stirred fraction cell by laser scattering, volume-based distribution. The median of the respective samples is given.

## Coin Cell dQ/dV Curves

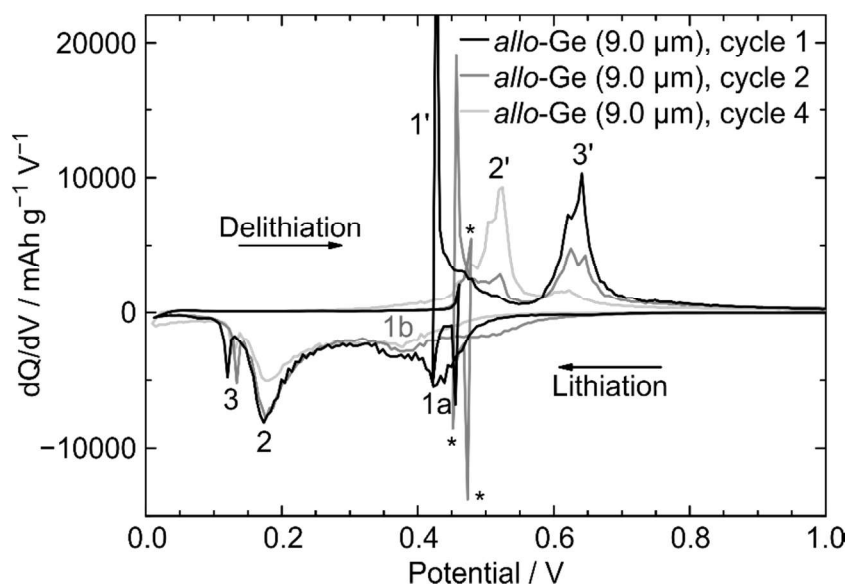

**Fig. S9.** dQ/dV curves from *allo*-Ge coin cells. Features marked with (\*) are artifacts due to overpotentials. First, second and fourth cycles shown.

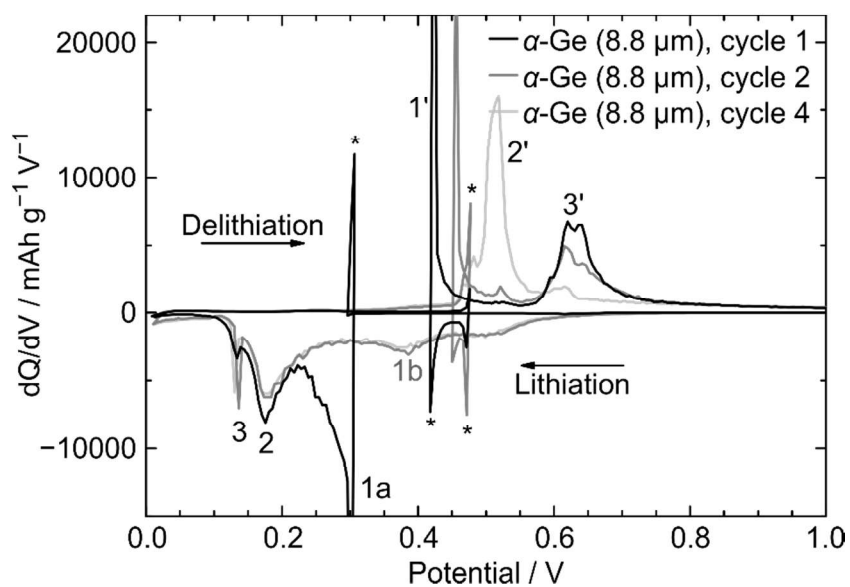

**Fig. S10.** dQ/dV curves for  $\alpha$ -Ge coin cells. Features marked with (\*) are artifacts due to overpotentials. First, second and fourth cycles shown.

## Ex-situ PXRD patterns of coin cell anode materials after cycling

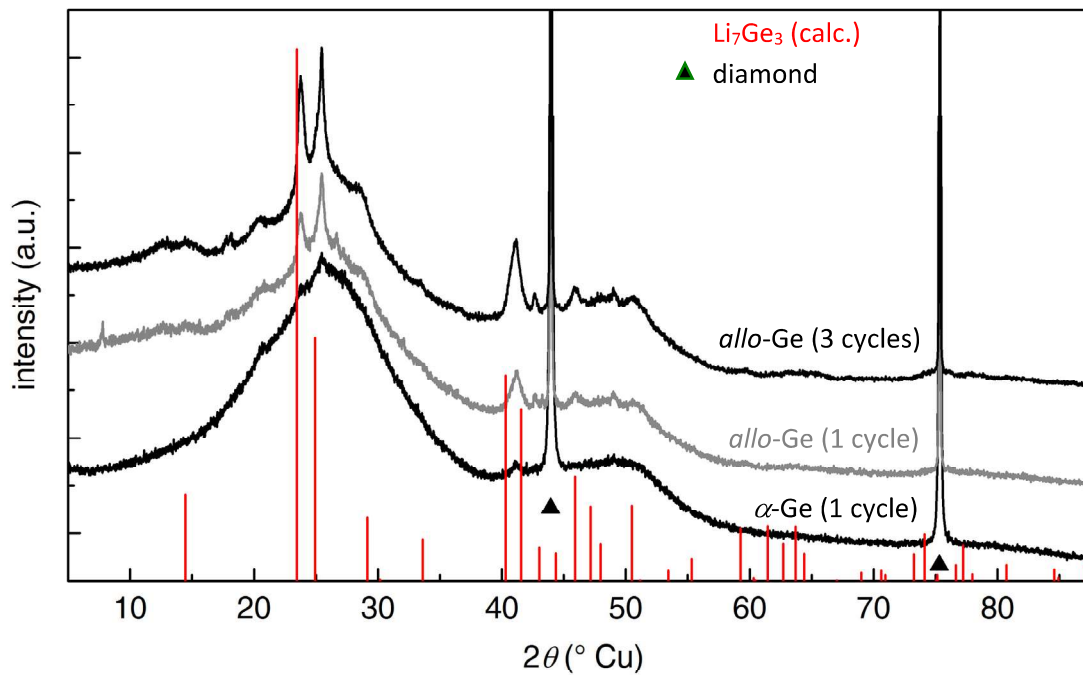

**Fig. S11.** Ex-situ-PXRD patterns of anode materials  $\alpha$ -Ge after 1 discharge/charge cycle, *allo*-Ge after 1 discharge/charge cycle, and *allo*-Ge after 3 discharge/charge cycles. All materials contain varying amounts of a crystalline phase resembling  $\text{Li}_7\text{Ge}_3$  (calculated diffraction pattern in red). Black triangles denote reflections of diamond which was mixed with the anode materials for easier handling.

## Selected in-situ PXRD patterns

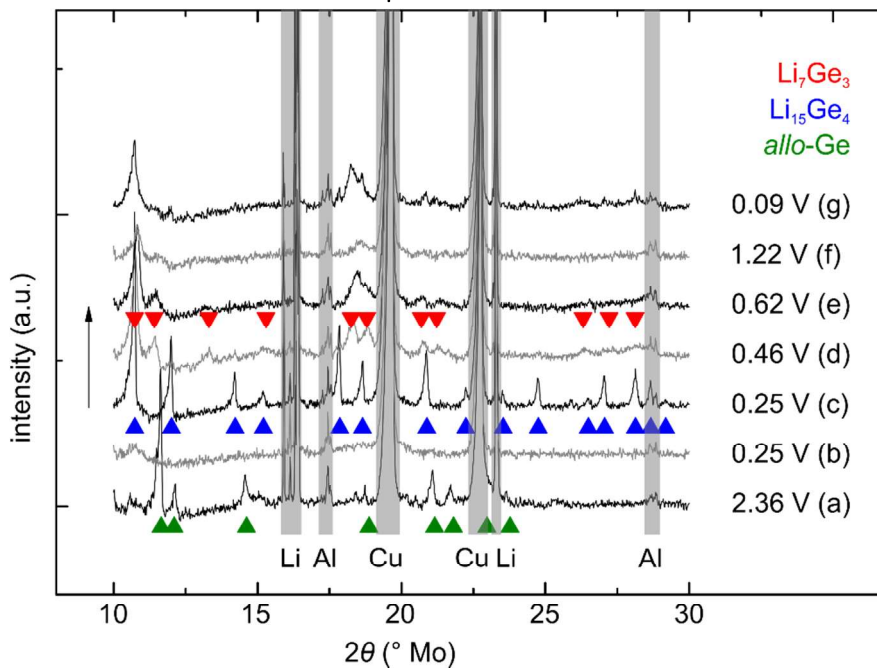

**Fig. S12.** Selected diffraction patterns from *allo*-Ge pouch cell. Data shown is averaged over 4 raw data files, i.e. one hour of measurement. The main reflections of all observed crystalline phases are marked. The average voltage and the position in Fig. 5 is indicated.

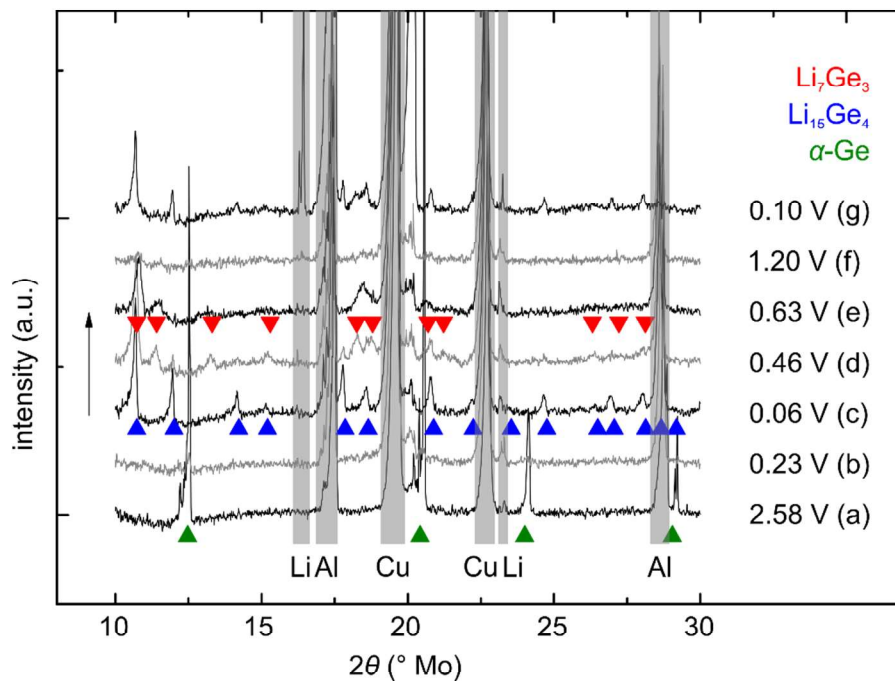

**Fig. S13.** Selected diffraction patterns from  $\alpha$ -Ge pouch cell. Data shown is averaged over 4 raw data files, i.e. one hour of measurement. The main reflections of all observed crystalline phases are marked. The average voltage and the position in Fig. 6 is indicated.

dQ/dV Plot for  $\alpha$ -Ge pouch cells

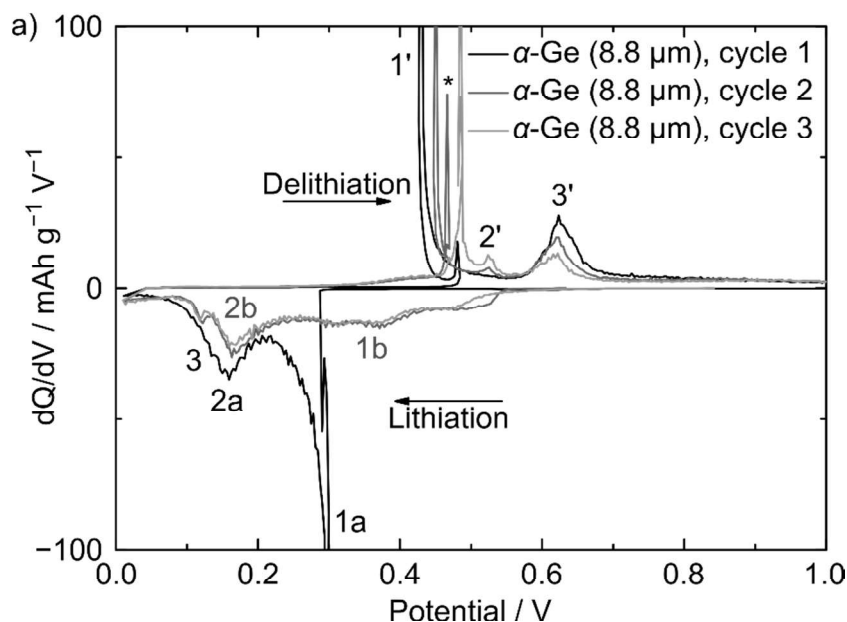

**b) Proposed (de-)lithiation mechanism for  $\alpha$ -Ge:**

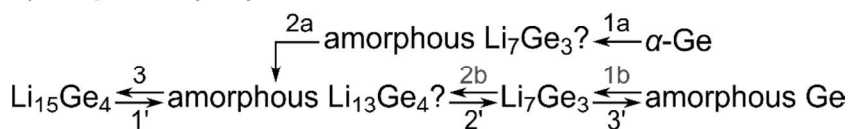

**Fig. S14.** a) dQ/dV plot of  $\alpha$ -Ge in in-situ PCRD pouch cell. An overpotential leads to an artifact peak and is marked by (\*), b) proposed (de-)lithiation mechanism for  $\alpha$ -Ge, in agreement with Grey *et al.*<sup>4</sup>

## References

- 1 F. Kiefer, A. J. Karttunen, M. Döblinger and T. F. Fässler, *Chem. Mater.*, 2011, **23**, 4578–4586.
- 2 M. E. Straumanis and E. Z. Aka, *J. Appl. Phys.*, 1952, **23**, 330–334.
- 3 F. Kiefer and T. F. Fässler, *Solid State Sci.*, 2011, **13**, 636–640.
- 4 H. Jung, P. K. Allan, Y.-Y. Hu, O. J. Borkiewicz, X.-L. Wang, W.-Q. Han, L.-S. Du, C. J. Pickard, P. J. Chupas, K. W. Chapman, A. J. Morris and C. P. Grey, *Chem. Mater.*, 2015, **27**, 1031–1041.
